# Supplementary material for: Electrochromism and electrochemical properties of complexes of transition metal ions with benzimidazole-based ligand
Source: Royal Society of Chemistry journal article supplement (doi:10.1039/c7ra10451k), 2017-01-01
Supplement: c7ra10451k1.pdf [file c7ra10451k1.pdf]

## Supporting Information

### **Electrochromism and electrochemical properties of complexes of transition metal ions with benzimidazole-based ligand**

Monika Wałęsa-Chorab,<sup>a\*</sup> Radosław Banasz,<sup>a</sup> Damian Marcinkowski,<sup>a,b</sup> Maciej Kubicki,<sup>a</sup> Violetta Patroniak<sup>a</sup>

<sup>a</sup>*Faculty of Chemistry, Adam Mickiewicz University, Umultowska 89b, 61614 Poznań, Poland*

<sup>b</sup>*Current address: Institute of Technology and Life Sciences, Biskupińska 67, 60-463 Poznań, Poland*

*\*Corresponding author: E-mail: mchorab@amu.edu.pl; Fax: +48 618291508; Tel: +48 618291772*

## Table of contents

|                                                                                                                                                                                                                                                                                                                                                                                                                                                               |   |
|---------------------------------------------------------------------------------------------------------------------------------------------------------------------------------------------------------------------------------------------------------------------------------------------------------------------------------------------------------------------------------------------------------------------------------------------------------------|---|
| Figure S1. Spectral changes of 1 in dehydrated and deaerated acetonitrile with 0.1 M TBAPF <sub>6</sub> as a supporting electrolyte by applying +1200 (■), +1300 (●), +1400 (▲), +1500 (▼) and +1600 mV (◆) potentials versus Ag/AgCl gel reference electrode held for 30 s per potential. Insert: photographs of the original (left) and electrochemically oxidized (right) 1 by applying a potential for 1 min. ....                                        | 3 |
| Figure S2. Spectral changes of 3 in dehydrated and deaerated acetonitrile with 0.1 M TBAPF <sub>6</sub> as a supporting electrolyte by applying 0 (■), -500 (●), -600 (▲) and -700 mV (▼) potentials versus Ag/AgCl gel reference electrode held for 30 s per potential. Insert: photographs of the original (left) and electrochemically reduced (right) 3 by applying a potential for 1 min. ....                                                           | 3 |
| Figure S3. Spectral changes of 4 in dehydrated and deaerated acetonitrile with 0.1 M TBAPF <sub>6</sub> as a supporting electrolyte by applying 0 (■), -500 (●), -600 (▲), -700 (▼) and -800 mV (◆) potentials versus Ag/AgCl gel reference electrode held for 30 s per potential. Insert: photographs of the original (left) and electrochemically reduced (right) 4 by applying a potential for 1 min. ....                                                 | 4 |
| Figure S4. Spectral changes of 5 in dehydrated and deaerated acetonitrile with 0.1 M TBAPF <sub>6</sub> as a supporting electrolyte by applying +400 (■), +500 (●), +600 (▲), +700 (▼), +800 (◆), +1000 (▶), +1100 (○), +1200 (□) and +1300 mV (Δ) potentials versus Ag/AgCl gel reference electrode held for 30 s per potential. Insert: photographs of the original (left) and electrochemically oxidized (right) 5 by applying a potential for 1 min. .... | 4 |
| Figure S5. The cyclic voltammogram (2 <sup>nd</sup> cycle) of Mn(II) complex 6 measured in anhydrous and deaerated acetonitrile with 0.1 M TBAPF <sub>6</sub> as a supporting electrolyte at a scan rate 100 mV/s scanned in the negative direction. ....                                                                                                                                                                                                     | 5 |
| Figure S11. Changes in transmittance of Cu(II) complex 2 measured in anhydrous and deaerated acetonitrile with 0.1 M TBAPF <sub>6</sub> as a supporting electrolyte and monitored at 420 nm when switching between -400 mV and +200 mV potential at 60 s cycles. ....                                                                                                                                                                                         | 5 |
| Figure S12. Changes in transmittance of Cu(II) complex 3 measured in anhydrous and deaerated acetonitrile with 0.1 M TBAPF <sub>6</sub> as a supporting electrolyte and monitored at 400 nm when switching between -700 mV and +300 mV potential at 60 s cycles. ....                                                                                                                                                                                         | 6 |
| Figure S13. Changes in transmittance of Cu(II) complex 4 measured in anhydrous and deaerated acetonitrile with 0.1 M TBAPF <sub>6</sub> as a supporting electrolyte and monitored at 400 nm when switching between -800 mV and +200 mV potential at 60 s cycles. ....                                                                                                                                                                                         | 6 |
| Figure S9. Changes in transmittance of Co(II) complex 5 measured in anhydrous and deaerated acetonitrile with 0.1 M TBAPF <sub>6</sub> as a supporting electrolyte and monitored at 400 nm when switching between -600 mV and +400 mV potential at 60 s cycles. ....                                                                                                                                                                                          | 7 |
| Table S1. CIE coordinates with D65 illuminant and 2° observer angle for the different states of ligand L and its complexes 1-5 in different states. ....                                                                                                                                                                                                                                                                                                      | 8 |
| Table S2. Crystal data, data collection and structure refinement. ....                                                                                                                                                                                                                                                                                                                                                                                        | 9 |

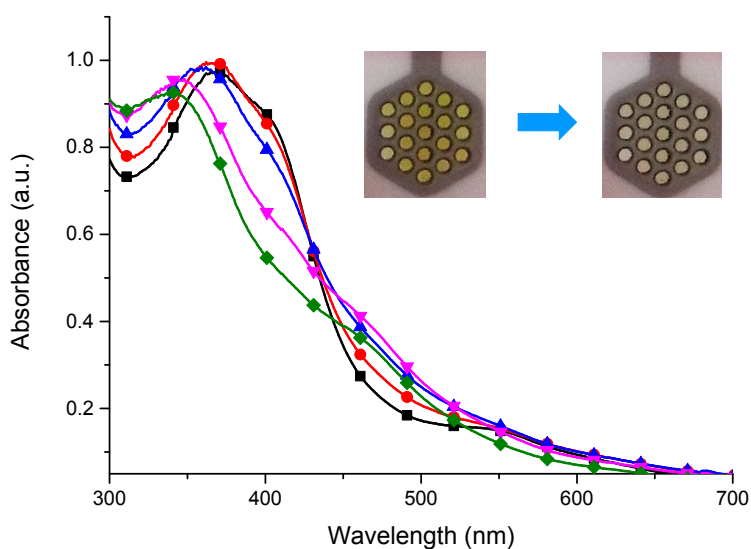

**Figure S1.** Spectral changes of **1** in dehydrated and deaerated acetonitrile with 0.1 M TBAPF<sub>6</sub> as a supporting electrolyte by applying +1200 (■), +1300 (●), +1400 (▲), +1500 (▼) and +1600 mV (◆) potentials versus Ag/AgCl gel reference electrode held for 30 s per potential. Insert: photographs of the original (left) and electrochemically oxidized (right) **1** by applying a potential for 1 min.

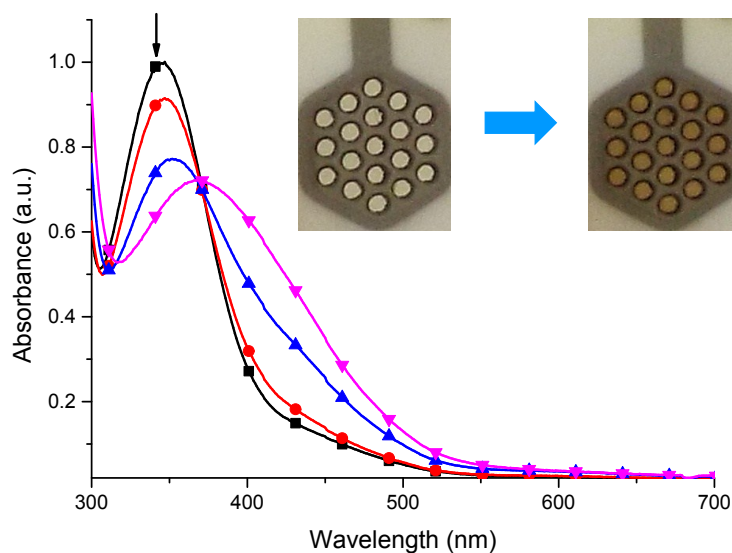

**Figure S2.** Spectral changes of **3** in dehydrated and deaerated acetonitrile with 0.1 M TBAPF<sub>6</sub> as a supporting electrolyte by applying 0 (■), -500 (●), -600 (▲) and -700 mV (▼) potentials versus Ag/AgCl gel reference electrode held for 30 s per potential. Insert: photographs of the original (left) and electrochemically reduced (right) **3** by applying a potential for 1 min.

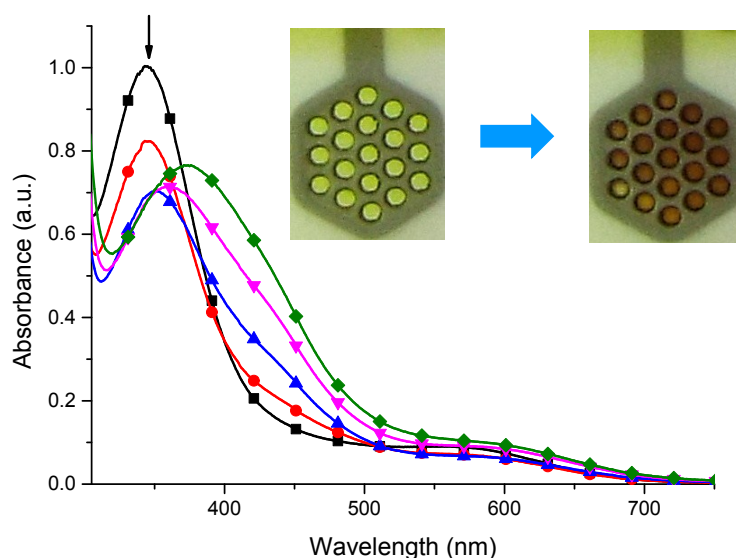

**Figure S3.** Spectral changes of **4** in dehydrated and deaerated acetonitrile with 0.1 M TBAPF<sub>6</sub> as a supporting electrolyte by applying 0 (■), -500 (●), -600 (▲), -700 (▼) and -800 mV (◆) potentials versus Ag/AgCl gel reference electrode held for 30 s per potential. Insert: photographs of the original (left) and electrochemically reduced (right) **4** by applying a potential for 1 min.

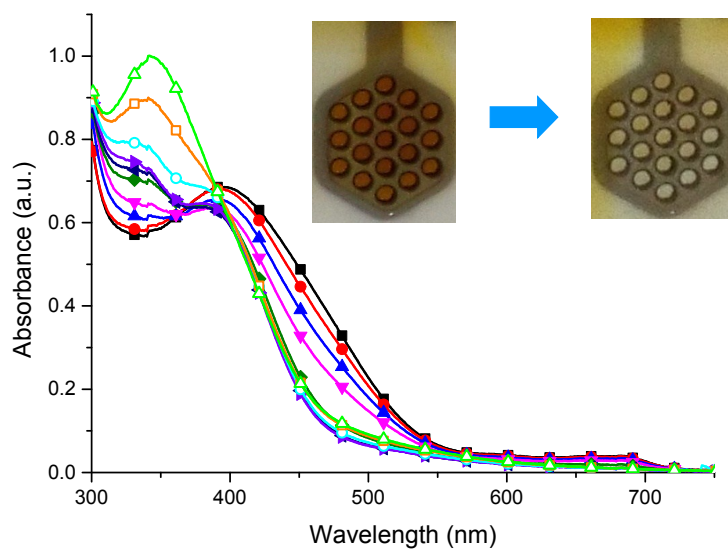

**Figure S4.** Spectral changes of **5** in dehydrated and deaerated acetonitrile with 0.1 M TBAPF<sub>6</sub> as a supporting electrolyte by applying +400 (■), +500 (●), +600 (▲), +700 (▼), +800 (◆), +1000 (►), +1100 (○), +1200 (□) and +1300 mV (△) potentials versus Ag/AgCl gel reference electrode held for 30 s per potential. Insert: photographs of the original (left) and electrochemically oxidized (right) **5** by applying a potential for 1 min.

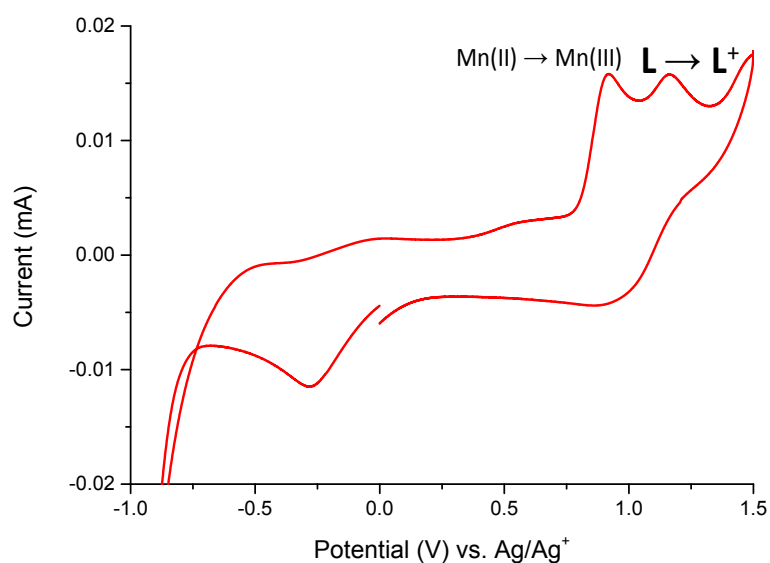

**Figure S5.** The cyclic voltammogram (2<sup>nd</sup> cycle) of Mn(II) complex **6** measured in anhydrous and deaerated acetonitrile with 0.1 M TBAPF<sub>6</sub> as a supporting electrolyte at a scan rate 100 mV/s scanned in the negative direction.

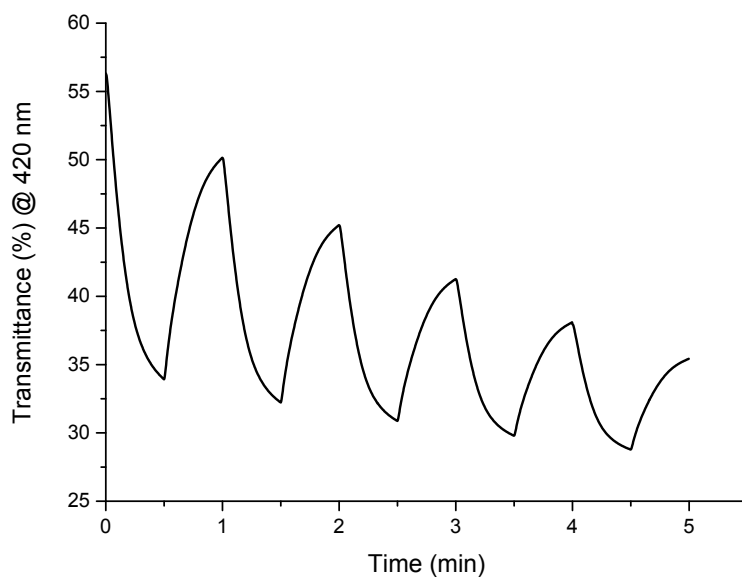

**Figure S6.** Changes in transmittance of Cu(II) complex **2** measured in anhydrous and deaerated acetonitrile with 0.1 M TBAPF<sub>6</sub> as a supporting electrolyte and monitored at 420 nm when switching between -400 mV and +200 mV potential at 60 s cycles.

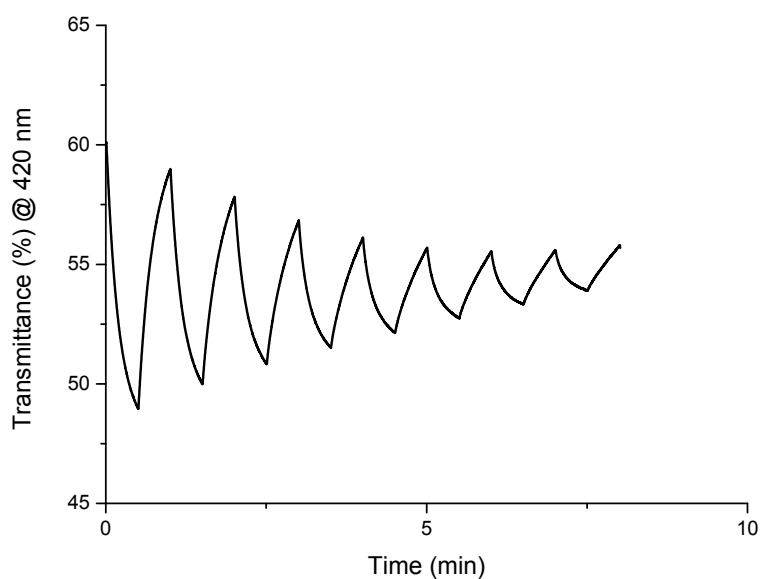

**Figure S7.** Changes in transmittance of Cu(II) complex **3** measured in anhydrous and deaerated acetonitrile with 0.1 M TBAPF<sub>6</sub> as a supporting electrolyte and monitored at 400 nm when switching between -700 mV and +300 mV potential at 60 s cycles.

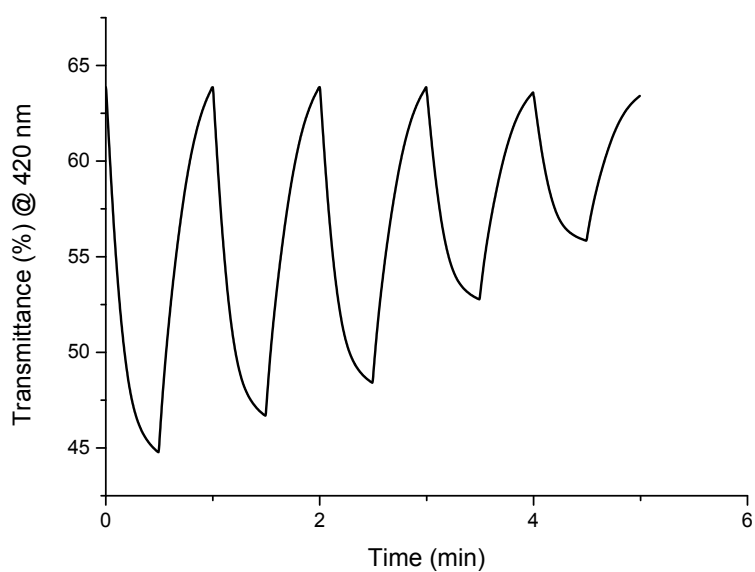

**Figure S8.** Changes in transmittance of Cu(II) complex **4** measured in anhydrous and deaerated acetonitrile with 0.1 M TBAPF<sub>6</sub> as a supporting electrolyte and monitored at 400 nm when switching between -800 mV and +200 mV potential at 60 s cycles.

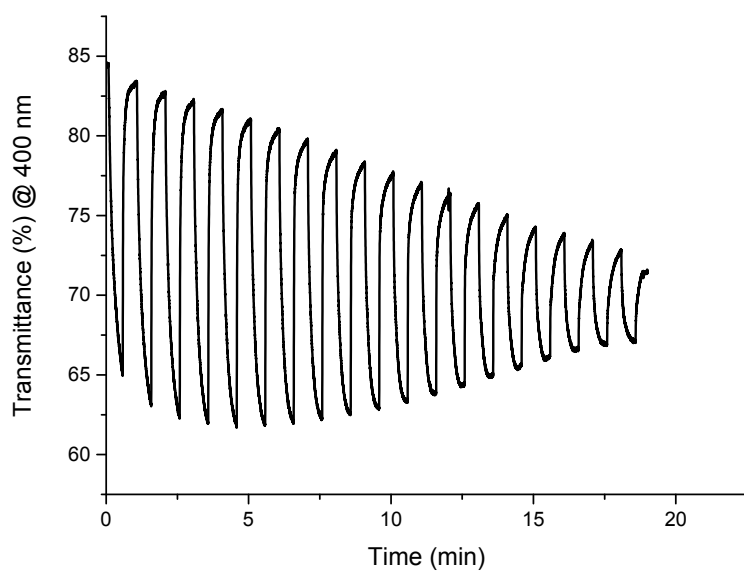

**Figure S9.** Changes in transmittance of Co(II) complex **5** measured in anhydrous and deaerated acetonitrile with 0.1 M TBAPF<sub>6</sub> as a supporting electrolyte and monitored at 400 nm when switching between -600 mV and +400 mV potential at 60 s cycles.

**Table S1.** CIE coordinates with D65 illuminant and 2° observer angle for the different states of ligand **L** and its complexes **1-5** in different states.

| Compound         |                                 | L*   | a*    | b*    |
|------------------|---------------------------------|------|-------|-------|
| Ligand <b>L</b>  | Neutral                         | 98.7 | -5.5  | 20.1  |
|                  | oxidized                        | 98.7 | -4.1  | 12.3  |
| Complex <b>1</b> | Neutral                         | 80.3 | 28.1  | -7.5  |
|                  | 1 <sup>st</sup> oxidation state | 83.4 | 2.8   | 45.3  |
|                  | 2 <sup>nd</sup> oxidation state | 82.2 | 0.2   | 32.9  |
|                  | Reduced                         | 79.7 | -19.6 | 33.3  |
| Complex <b>2</b> | Neutral                         | 85.6 | -6.4  | 26.15 |
|                  | Reduced                         | 83.8 | 10.0  | 25.4  |
| Complex <b>3</b> | Neutral                         | 95.1 | -2.7  | 10.2  |
|                  | Reduced                         | 93.2 | 5.8   | 9.5   |
| Complex <b>4</b> | Neutral                         | 80.1 | -7.4  | 30.1  |
|                  | Reduced                         | 78.8 | 16.2  | 27.4  |
| Complex <b>5</b> | Neutral                         | 94.6 | -5.2  | 29.9  |
|                  | 1 <sup>st</sup> oxidation state | 91.6 | 15.1  | 48.5  |
|                  | 2 <sup>nd</sup> oxidation state | 95.0 | -4.2  | 16.3  |



**Table S2.** Crystal data, data collection and structure refinement.

| Compound                             | 1                                                                                                            | 2                                                                                             | 3                                                                                                             | 4                                                                                       | 5                                                                                                     | 6                                                                |
|--------------------------------------|--------------------------------------------------------------------------------------------------------------|-----------------------------------------------------------------------------------------------|---------------------------------------------------------------------------------------------------------------|-----------------------------------------------------------------------------------------|-------------------------------------------------------------------------------------------------------|------------------------------------------------------------------|
| Formula                              | C <sub>30</sub> H <sub>30</sub> FeN <sub>10</sub><br>·2(CF <sub>3</sub> O <sub>3</sub> S)·CH <sub>3</sub> CN | C <sub>18</sub> H <sub>19</sub> CuF <sub>6</sub> N <sub>5</sub> O <sub>7</sub> S <sub>2</sub> | C <sub>16</sub> H <sub>19</sub> CuN <sub>6</sub> O <sub>4</sub> <sup>+</sup><br>·NO <sub>3</sub> <sup>-</sup> | C <sub>15</sub> H <sub>15</sub> Br <sub>2</sub> CuN <sub>5</sub><br>·CH <sub>3</sub> OH | C <sub>15</sub> H <sub>15</sub> Cl <sub>2</sub> CoN <sub>5</sub><br>·C <sub>2</sub> H <sub>5</sub> OH | C <sub>15</sub> H <sub>15</sub> Br <sub>2</sub> MnN <sub>5</sub> |
| Formula weight                       | 925.68                                                                                                       | 659.04                                                                                        | 484.92                                                                                                        | 520.72                                                                                  | 441.22                                                                                                | 480.08                                                           |
| Crystal system                       | monoclinic                                                                                                   | triclinic                                                                                     | monoclinic                                                                                                    | triclinic                                                                               | orthorhombic                                                                                          | triclinic                                                        |
| Space group                          | P2 <sub>1</sub> /n                                                                                           | P-1                                                                                           | P2 <sub>1</sub> /n                                                                                            | P-1                                                                                     | Pbca                                                                                                  | P-1                                                              |
| a(Å)                                 | 9.7491(3)                                                                                                    | 8.0767(3)                                                                                     | 9.6735(9)                                                                                                     | 9.6841(12)                                                                              | 11.59108(13)                                                                                          | 7.6305(5)                                                        |
| b(Å)                                 | 16.1976(4)                                                                                                   | 11.3717(5)                                                                                    | 17.4644(11)                                                                                                   | 10.0927(9)                                                                              | 15.95415(19)                                                                                          | 8.9863(5)                                                        |
| c(Å)                                 | 24.3248(6)                                                                                                   | 13.9815(8)                                                                                    | 12.1452(13)                                                                                                   | 10.4709(9)                                                                              | 20.3432(3)                                                                                            | 13.5352(8)                                                       |
| α(°)                                 | 90                                                                                                           | 76.300(4)                                                                                     | 90                                                                                                            | 91.231(7)                                                                               | 90                                                                                                    | 83.946(5)                                                        |
| β(°)                                 | 95.452(2)                                                                                                    | 82.265(4)                                                                                     | 103.407(10)                                                                                                   | 92.328(8)                                                                               | 90                                                                                                    | 75.427(6)                                                        |
| γ(°)                                 | 90                                                                                                           | 85.663(3)                                                                                     | 90                                                                                                            | 117.823(11)                                                                             | 90                                                                                                    | 67.854(6)                                                        |
| V(Å <sup>3</sup> )                   | 3823.80(18)                                                                                                  | 1234.98(10)                                                                                   | 1995.9(3)                                                                                                     | 903.40(18)                                                                              | 3761.98(8)                                                                                            | 831.92(10)                                                       |
| Z                                    | 4                                                                                                            | 2                                                                                             | 4                                                                                                             | 2                                                                                       | 8                                                                                                     | 2                                                                |
| D <sub>x</sub> (g cm <sup>-3</sup> ) | 1.61                                                                                                         | 1.77                                                                                          | 1.61                                                                                                          | 1.91                                                                                    | 1.56                                                                                                  | 1.92                                                             |
| F(000)                               | 1896                                                                                                         | 666                                                                                           | 996                                                                                                           | 514                                                                                     | 1816                                                                                                  | 470                                                              |
| μ(mm <sup>-1</sup> )                 | 0.60                                                                                                         | 1.15                                                                                          | 1.15                                                                                                          | 5.65                                                                                    | 9.91                                                                                                  | 5.60                                                             |
| Reflections:                         |                                                                                                              |                                                                                               |                                                                                                               |                                                                                         |                                                                                                       |                                                                  |
| collected                            | 14830                                                                                                        | 8888                                                                                          | 7123                                                                                                          | 5979                                                                                    | 18640                                                                                                 | 5914                                                             |
| unique (R <sub>int</sub> )           | 7317 (0.019)                                                                                                 | 5079 (0.015)                                                                                  | 3514 (0.021)                                                                                                  | 3675 (0.017)                                                                            | 3838 (0.057)                                                                                          | 3403 (0.019)                                                     |
| with I>2σ(I)                         | 6090                                                                                                         | 4552                                                                                          | 2618                                                                                                          | 3322                                                                                    | 3622                                                                                                  | 3123                                                             |
| R(F) [I>2σ(I)]                       | 0.050                                                                                                        | 0.027                                                                                         | 0.055                                                                                                         | 0.028                                                                                   | 0.050                                                                                                 | 0.025                                                            |
| wR(F <sup>2</sup> ) [I>2σ(I)]        | 0.122                                                                                                        | 0.069                                                                                         | 0.132                                                                                                         | 0.071                                                                                   | 0.149                                                                                                 | 0.057                                                            |
| R(F) [all data]                      | 0.061                                                                                                        | 0.032                                                                                         | 0.079                                                                                                         | 0.033                                                                                   | 0.052                                                                                                 | 0.029                                                            |
| wR(F <sup>2</sup> ) [all data]       | 0.130                                                                                                        | 0.071                                                                                         | 0.142                                                                                                         | 0.074                                                                                   | 0.152                                                                                                 | 0.059                                                            |
| Goodness of fit                      | 1.04                                                                                                         | 1.04                                                                                          | 1.05                                                                                                          | 1.05                                                                                    | 1.05                                                                                                  | 1.08                                                             |
| max/min Δρ (e Å <sup>-3</sup> )      | 1.50/-0.84                                                                                                   | 0.39/-0.38                                                                                    | 0.80/-0.46                                                                                                    | 0.8450/-1.02                                                                            | 1.68/-0.61                                                                                            | 0.53/-0.49                                                       |
